# Supplementary material for: Sliding of drops on mesoporous thin films
Source: Royal Society of Chemistry journal article supplement (doi:10.1039/c9cp06993c), 2020-01-01
Supplement: c9cp06993c1.pdf [file c9cp06993c1.pdf]

## **SUPPLEMENTARY INFORMATION**

### **Sliding of Drops on Mesoporous Thin Films**

*Rocío Gimenez,<sup>1</sup> Magalí Mercuri,<sup>1</sup> Claudio L. A. Berli<sup>2,\*</sup> and Martín G. Bellino<sup>1,\*</sup>*

- 1- Instituto de Nanociencia y Nanotecnología (CNEA-CONICET), Av. Gral. Paz 1499,  
San Martín, Buenos Aires, Argentina
- 2- INTEC (Universidad Nacional del Litoral-CONICET) Predio CCT CONICET Santa  
Fe, RN 168, 3000 Santa Fe, Argentina.

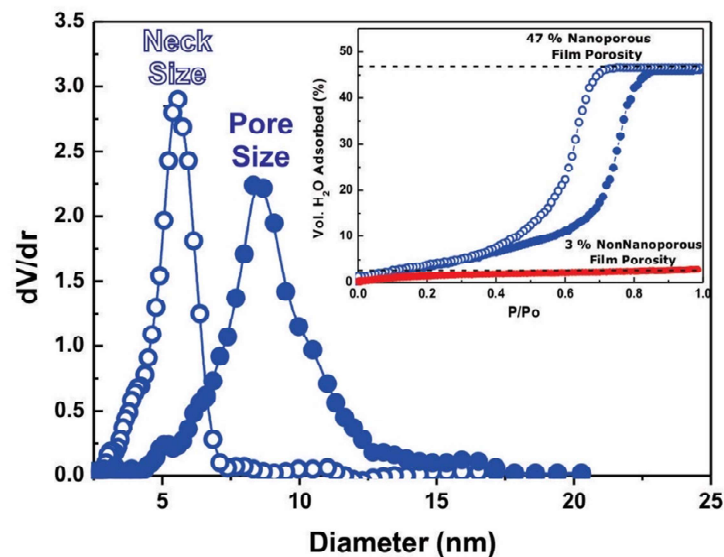

**Figure S1:** Nanoarchitecture of the nanoporous thin films used in this study. Typical pore size distribution and neck size distribution obtained by water adsorption-desorption isotherms at 298 K (see inset). Adsorption isotherm obtained from a non-nanoporous film is shown for comparative propose.

Adsorption/desorption isotherms were determined by environmental ellipsometric porosimetry (EEP) using a SOPRA GES5A apparatus, equipped with microspot optics, according to the protocols developed by Boissiere et. al. *Langmuir* 21, 12362-12371 (2005). Film thickness and the real component of the refractive index were obtained from the ellipsometric parameters  $\psi(\lambda)$  and  $\Delta(\lambda)$ ; the film refractive index was described according to a modified Cauchy equation. Pore size distributions were obtained from the analysis of the refractive index variation, using the WinElli 2 software which transforms the variation of  $n$  with  $P/P^0$  into filled pore volume by using a three-medium BEMA treatment. Pore and neck size distributions are derived according to a Kelvin model.

**Table S1:** Structural data obtained from ellipsoporosimetry of the films.

|              | <b>Pore Size<br/>(nm)</b> | <b>Neck Size<br/>(nm)</b> | <b>Thickness<br/>(nm)</b> | <b>Porosity<br/>(%)</b> |
|--------------|---------------------------|---------------------------|---------------------------|-------------------------|
| <b>N-MTF</b> | -----                     | -----                     | 165 ± 1                   | 3 ± 0.5                 |
| <b>MTF</b>   | 8.5 ± 1                   | 5.5 ± 0.5                 | 170 ± 1                   | 47 ± 1                  |

**Table S2.** Contact angle measurements for water and oil (Pfeiffer Vacuum GmbH) drops on the surfaces.

|              | <b>Contact Angle (°)<br/>Water</b> | <b>Contact Angle (°)<br/>Oil</b> |
|--------------|------------------------------------|----------------------------------|
| <b>SSO</b>   | 32 ± 1                             | 21 ± 1                           |
| <b>N-MTF</b> | 30 ± 1                             | 22 ± 1                           |
| <b>MTF</b>   | 31 ± 2                             | 20 ± 1                           |

**Table S3.** Droplet base radius when water or oil (Pfeiffer Vacuum GmbH) are placed on the three surfaces.

| <b>Water</b> | <b>Drop radius (mm)</b> | <b>Drop radius (mm)</b> | <b>Drop radius (mm)</b> | <b>Drop radius (mm)</b> |
|--------------|-------------------------|-------------------------|-------------------------|-------------------------|
|              | <b>Vol = 15 µl</b>      | <b>Vol = 20 µl</b>      | <b>Vol = 30 µl</b>      | <b>Vol = 40 µl</b>      |
| <b>SSO</b>   | 3.1 ± 0.2               | 3.4 ± 0.2               | 3.7 ± 0.2               | 4.4 ± 0.2               |
| <b>N-MTF</b> | 2.9 ± 0.2               | 3.5 ± 0.2               | 3.9 ± 0.2               | 4.2 ± 0.2               |
| <b>MTF</b>   | 3.0 ± 0.2               | 3.3 ± 0.2               | 3.8 ± 0.2               | 4.3 ± 0.2               |
| <b>Oil</b>   | <b>Drop radius (mm)</b> | <b>Drop radius (mm)</b> | <b>Drop radius (mm)</b> | <b>Drop radius (mm)</b> |
|              | <b>Vol = 15 µl</b>      | <b>Vol = 20 µl</b>      | <b>Vol = 30 µl</b>      | <b>Vol = 40 µl</b>      |
| <b>SSO</b>   | 3.6 ± 0.2               | 4.1 ± 0.2               | 4.8 ± 0.2               | 5.3 ± 0.2               |
| <b>N-MTF</b> | 3.8 ± 0.2               | 4.4 ± 0.2               | 4.7 ± 0.2               | 5.1 ± 0.2               |
| <b>MTF</b>   | 3.5 ± 0.2               | 4.2 ± 0.2               | 4.5 ± 0.2               | 5.0 ± 0.2               |

**Table S4.** Physicochemical properties of fluids at 25 °C.

| Fluid          | Density                     | Viscosity    | Surface tension | Capillary length |
|----------------|-----------------------------|--------------|-----------------|------------------|
|                | $\rho$ [kg/m <sup>3</sup> ] | $\mu$ [Pa s] | $\gamma$ [N/m]  | $\lambda$ [m]    |
| Water          | 998                         | 0.0009       | 0.073           | 0.0027           |
| Oil (Pfeiffer) | 870                         | 0.0827       | ~0.025          | ~0.0017          |

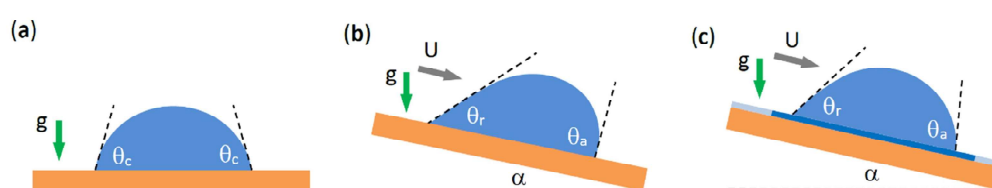

**Figure S2.** Schematic representation of droplets, where the contact angles illustrate the different pinning of surfaces. (a) Sessile droplet on a horizontal surface. (b) Sessile droplet on an inclined N-MTF surface. (c) Sessile droplet on an inclined MTF surface.

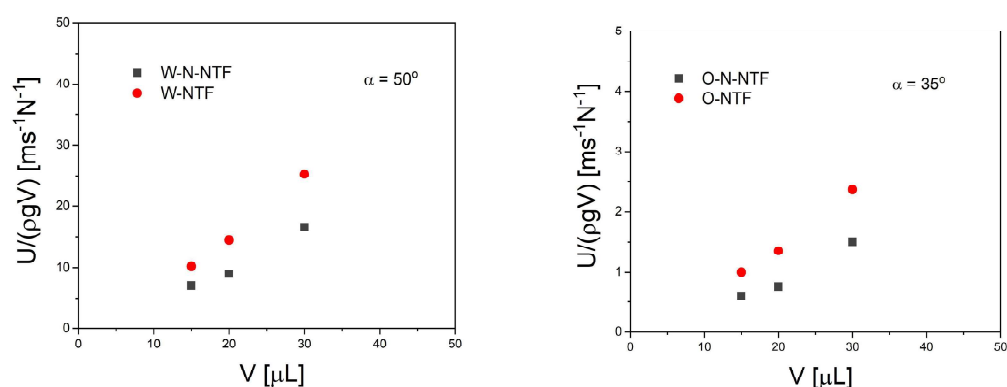

**Figure S3.** Droplet mobility (defined as the droplet velocity relative to the driving force) on different surfaces, as a function of the droplet volume, for water (left panel) and oil (right panel). The droplet velocity corresponds to that in Figure 5, where the surfaces were tilted 50° and 35° for the water and oil drops, respectively. The droplet mobility increases with the droplet volume, showing that the relationship  $U$  vs  $V$  is nonlinear for these systems.
